# Supplementary material for: Reduction of intratumoral brain perfusion by noninvasive transcranial electrical stimulation
Source: PubMed Central journal article supplement — Sci Adv. 2019 Aug 14;5(8):eaau9309. doi: 10.1126/sciadv.aau9309 (PMC6693907; doi:10.1126/sciadv.aau9309), 2019-08-14
Supplement: aau9309_SM.pdf [file aau9309_SM.pdf]

## Supplementary Materials for

### **Reduction of intratumoral brain perfusion by noninvasive transcranial electrical stimulation**

G. Sprugnoli, L. Monti, L. Lippa, F. Neri, L. Mencarelli, G. Ruffini, R. Salvador, G. Oliveri, B. Batani, D. Momi, A. Cerase, A. Pascual-Leone, A. Rossi, S. Rossi, E. Santarnecchi\*

\*Corresponding author. Email: [esantarn@bidmc.harvard.edu](mailto:esantarn@bidmc.harvard.edu)

Published 14 August 2019, *Sci. Adv.* **5**, eaau9309 (2019)  
DOI: 10.1126/sciadv.aau9309

#### **This PDF file includes:**

Fig. S1. rs-fMRI changes.

Table S1. Histological data of patients with GBM.

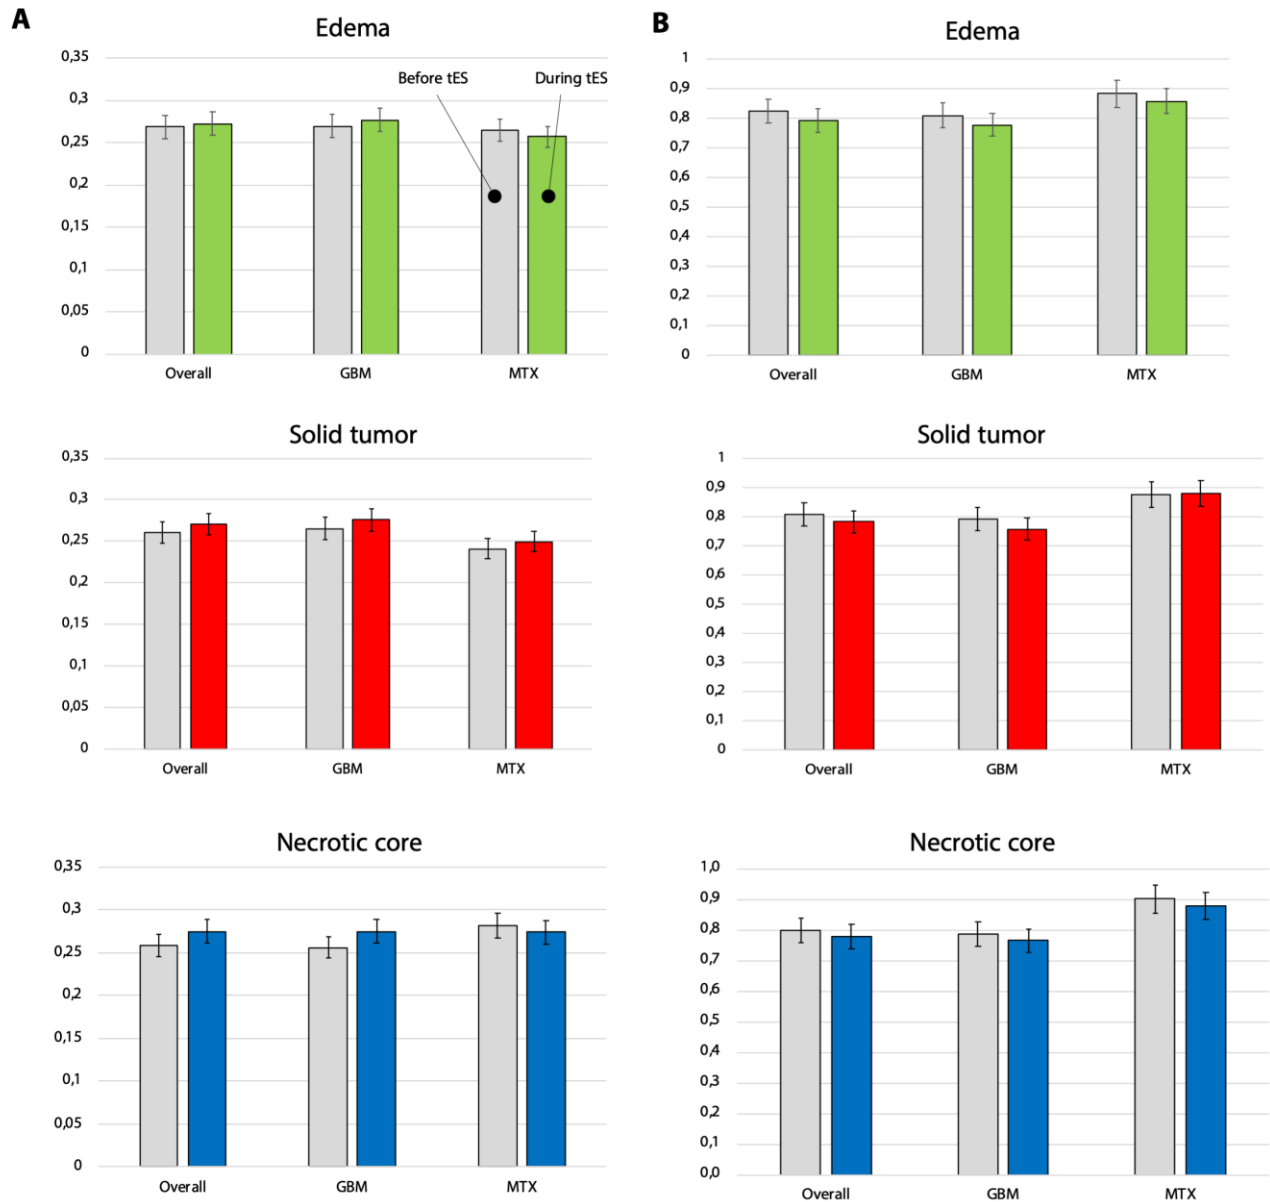

**Fig. S1. rs-fMRI changes.** Both fALFF (A) and ReHo (B) metrics extracted from rs-fMRI data did not significantly differ during tES compared to before stimulation. Note: tES = transcranial Electrical Current Stimulation; GBM = glioblastomas, MTX = metastases.

**Table S1. Histological data of patients with GBM.** Note: EGFR = Epidermal Growth Factor Receptor; mIDH1= mutated Isocitrate Dehydrogenase 1; mMGMT = methylated O6-Methylguanine-DNA methyltransferase (%).

| <b>Patient</b> | <b>MIB1</b> | <b>EGFR</b> | <b>mIDH1</b> | <b>p53</b>        | <b>mMGMT</b>      | <b>Neoangiogenesis</b> |
|----------------|-------------|-------------|--------------|-------------------|-------------------|------------------------|
| 1              | 20-25%      | 70-80%      | negative     | negative          | negative (0,5%)   | high                   |
| 3              | 5-8%        | -           | negative     | negative          | negative (1,28%)  | moderate               |
| 5              | 15-20%      | -           | negative     | negative (<20%)   | positive (56,81%) | high                   |
| 6              | 25-30%      | -           | negative     | negative          | negative (0,44%)  | high                   |
| 7              | 35-40%      | -           | negative     | negative          | positive (64,17%) | high                   |
| 8              | 40-45%      | 70-80%      | negative     | positive (80-90%) | positive (61,19%) | high                   |
